# Supplementary material
Source: Royal Society of Chemistry journal article supplement (doi:10.1039/d6gc00699j)
Supplement: d6gc00699j1.pdf [file d6gc00699j1.pdf]

## Supplementary Information

### **A Robust and Efficient Heterogeneous MoS<sub>2</sub>/Al<sub>2</sub>O<sub>3</sub> Catalyst for the Hydrogenative Recycling of Polyurethane Waste**

Congxue Yuan,<sup>a</sup> Shuang Cao,<sup>a</sup> Liang Chen,<sup>a</sup> Ruitong Gao,<sup>\*a</sup> Yajing Duan<sup>\*b</sup> and Hui Du<sup>\*a</sup>

<sup>a</sup>College of Chemistry and Chemical Engineering, Qingdao University, Qingdao, Shandong, 266071, P. R. China.

E-mail: gaoruitong@qdu.edu.cn, duhui@qdu.edu.cn

<sup>b</sup>College of Physics, Qingdao University, Qingdao, Shandong 266071, P. R. China.

E-mail: duanyajing@qdu.edu.cn

## Supplementary Tables

**Table S1.** The ICP-OES elemental analysis of MoS<sub>2</sub>/Al<sub>2</sub>O<sub>3</sub>.

| Sample                                           | element | Content (%) |
|--------------------------------------------------|---------|-------------|
| MoS <sub>2</sub> /Al <sub>2</sub> O <sub>3</sub> | S       | 4.67        |
|                                                  | Mo      | 6.71        |
|                                                  | Al      | 21.70       |

**Table S2.** The average molecular weight of PU-1.

| Peak | Rt<br>min | M <sub>p</sub><br>g/mol | M <sub>n</sub><br>g/mol | M <sub>w</sub><br>g/mol | M <sub>z</sub><br>g/mol | M <sub>z+</sub><br>g/mol | PDI      |
|------|-----------|-------------------------|-------------------------|-------------------------|-------------------------|--------------------------|----------|
| 1    | 8.240     | 16960                   | 8235                    | 22098                   | 45289                   | 74003                    | 2.683424 |

**Table S3.** Comparison of catalysts for PU hydrogenation reported in recent literature.

| PU model                                                                                                                | Catalyst                                                                                                                         | Reaction conditions                                                                                  | Product                                                                                                                                                                                                                                                                                                                 | Ref. |
|-------------------------------------------------------------------------------------------------------------------------|----------------------------------------------------------------------------------------------------------------------------------|------------------------------------------------------------------------------------------------------|-------------------------------------------------------------------------------------------------------------------------------------------------------------------------------------------------------------------------------------------------------------------------------------------------------------------------|------|
| 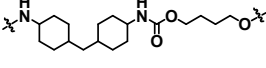<br>M <sub>w</sub> unknown<br>1 mmol   | <br>R = <sup>t</sup> Bu R = Benzyl<br>0.02 mmol | KO <sup>t</sup> Bu (0.08 mmol),<br>DMSO, H <sub>2</sub> (70 bar), 150 °C, 48 h                       | H <sub>2</sub> N-CH <sub>2</sub> -CH <sub>2</sub> -CH <sub>2</sub> -CH <sub>2</sub> -NH <sub>2</sub><br>66%<br>HO-CH <sub>2</sub> -CH <sub>2</sub> -CH <sub>2</sub> -CH <sub>2</sub> -OH<br>70%                                                                                                                         | 1    |
| <br>M <sub>w</sub> unknown<br>1 mmol   | <br>R = Cy<br>1 mol%                            | KO <sup>t</sup> Bu (4 mol%),<br>THF, H <sub>2</sub> (50 bar),<br>120 °C, 24 h                        | H <sub>2</sub> N-CH <sub>2</sub> -CH <sub>2</sub> -CH <sub>2</sub> -CH <sub>2</sub> -NH <sub>2</sub><br>76%<br>HO-CH <sub>2</sub> -CH <sub>2</sub> -CH <sub>2</sub> -CH <sub>2</sub> -OH<br>85%                                                                                                                         | 2    |
| <br>0.5 mmol                           | <br>1 mol%                                      | KO <sup>t</sup> Bu (2 mol%),<br>THF, H <sub>2</sub> (30 bar),<br>150 °C, 21 h                        | H <sub>2</sub> N-CH <sub>2</sub> -CH <sub>2</sub> -CH <sub>2</sub> -NH <sub>2</sub><br>93%<br>HO-CH <sub>2</sub> -CH <sub>2</sub> -OH<br>not detected                                                                                                                                                                   | 3    |
| <br>0.5 mmol                          | <br>2 mol%                                     | KO <sup>t</sup> Bu (6 mol%),<br>toluene/ <i>i</i> PrOH,<br>120 °C, 16 h                              | H <sub>2</sub> N-CH <sub>2</sub> -CH <sub>2</sub> -NH <sub>2</sub><br>79%<br>HO-CH <sub>2</sub> -CH <sub>2</sub> -OH<br>62%                                                                                                                                                                                             | 4    |
| <br>M <sub>w</sub> unknown<br>1 mmol | <br>0.04 mmol                                 | KO <sup>t</sup> Bu (0.08 mmol),<br>toluene, H <sub>2</sub> (60 bar), 170 °C, 24 h                    | H <sub>2</sub> N-CH <sub>2</sub> -CH <sub>2</sub> -CH <sub>2</sub> -CH <sub>2</sub> -NH <sub>2</sub><br>81%<br>HO-CH <sub>2</sub> -CH <sub>2</sub> -CH <sub>2</sub> -CH <sub>2</sub> -OH<br>79%                                                                                                                         | 5    |
| <br>M <sub>w</sub> unknown<br>260 mg | <br>1 wt%                                     | KOH (10 wt%),<br><i>i</i> PrOH, H <sub>2</sub> (50 bar), 180 °C, 21 h                                | H <sub>2</sub> N-CH <sub>2</sub> -CH <sub>2</sub> -CH <sub>2</sub> -CH <sub>2</sub> -NH <sub>2</sub><br>92%<br>HO-CH <sub>2</sub> -CH <sub>2</sub> -CH <sub>2</sub> -CH <sub>2</sub> -OH<br>92%                                                                                                                         | 6    |
| <br>2 mmol                           | <br>0.25 mol%                                 | KBH <sub>4</sub> (0.25 mol%),<br><i>tert</i> -amyl alcohol,<br>H <sub>2</sub> (50 bar), 140 °C, 20 h | H <sub>2</sub> N-CH <sub>2</sub> -CH <sub>2</sub> -NH <sub>2</sub><br>98%<br>HO-CH <sub>2</sub> -CH <sub>2</sub> -OH<br>95%                                                                                                                                                                                             | 7    |
| <br>M <sub>w</sub> ~33 kDa<br>200 mg | ZnO-ZrO <sub>2</sub> /Cu<br>200 mg                                                                                               | THF (30 mL),<br>CO <sub>2</sub> /H <sub>2</sub> (1/3, v/v, 3 MPa), 200 °C, 4 h                       | H <sub>2</sub> N-CH <sub>2</sub> -CH <sub>2</sub> -CH <sub>2</sub> -CH <sub>2</sub> -NH <sub>2</sub><br>~25.0%<br>H <sub>2</sub> N-CH <sub>2</sub> -CH <sub>2</sub> -CH <sub>2</sub> -CH <sub>2</sub> -NH <sub>2</sub><br>~61.4%<br>HO-CH <sub>2</sub> -CH <sub>2</sub> -CH <sub>2</sub> -CH <sub>2</sub> -OH<br>~16.7% | 8    |

|                                                                                                                               |                                                           |                                                                                                     |                                                                                                                                                                                                                                                                                                                          |              |
|-------------------------------------------------------------------------------------------------------------------------------|-----------------------------------------------------------|-----------------------------------------------------------------------------------------------------|--------------------------------------------------------------------------------------------------------------------------------------------------------------------------------------------------------------------------------------------------------------------------------------------------------------------------|--------------|
| 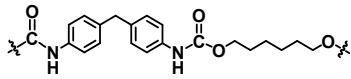 <p><math>M_w</math> unknown<br/>300 mg</p>  | NiMo/ $\gamma$ -Al <sub>2</sub> O <sub>3</sub><br>100 mg  | KOH (6 wt%),<br>1,4-dioxane, H <sub>2</sub><br>(50 bar), 185 °C,<br>16 h                            | <p>~99.8%</p>  <p>92%</p>  <p>not detected</p>                                                                                                     | 9            |
|  <p><math>M_w</math> ~1.3 kDa<br/>250 mg</p> | CeO <sub>2</sub><br>25 mg                                 | H <sub>2</sub> (10 bar), 200<br>°C, 4 h                                                             |  <p>89%</p>  <p>97%</p>                                         | 10           |
|  <p><math>M_w</math> ~181 kDa<br/>3.3 g</p>  | Pd/ $\gamma$ -Al <sub>2</sub> O <sub>3</sub><br>10 wt%    | KBH <sub>4</sub> (1 wt%),<br><i>tert</i> -amyl alcohol,<br>H <sub>2</sub> (50 bar), 180<br>°C, 24 h |  <p>0.54 g</p>  <p>0.35 g</p>  <p><math>M_w</math> ~3.5 kDa</p> | 11           |
|  <p><math>M_w</math> ~22 kDa<br/>300 mg</p>  | MoS <sub>2</sub> /Al <sub>2</sub> O <sub>3</sub><br>50 mg | K <sub>2</sub> CO <sub>3</sub> (15 mg),<br>1,4-dioxane, H <sub>2</sub><br>(50 bar), 185 °C,<br>12 h |  <p>84.2%</p>  <p>92.5%</p>                                                                                                                       | This<br>work |

**Table S4.** Supplemental experiments on the catalytic performance of MoS<sub>2</sub>/Al<sub>2</sub>O<sub>3</sub>.

| Entry          | Reactant         | Catalyst                                                                                         | Aniline yield (%) |
|----------------|------------------|--------------------------------------------------------------------------------------------------|-------------------|
| 1 <sup>a</sup> | 1,3-Diphenylurea | 50 mg MoS <sub>2</sub> /Al <sub>2</sub> O <sub>3</sub>                                           | 72.5              |
| 2 <sup>a</sup> | 1,3-Diphenylurea | 50 mg MoS <sub>2</sub> /Al <sub>2</sub> O <sub>3</sub><br>+ 15 mg K <sub>2</sub> CO <sub>3</sub> | 98.7              |

a: Reaction conditions: 173 mg of 1,3-Diphenylurea, catalyst (specific amount as indicated in the table), 5 mL of 1,4-dioxane, 185 °C, 50 bar H<sub>2</sub>, 600 rpm, 4 h.

**Table S5.** Life Cycle Assessment (LCA) calculation data of the MoS<sub>2</sub>/Al<sub>2</sub>O<sub>3</sub> system.

|                                    | <b>GWP</b><br>kgCO <sub>2</sub> -Eq | <b>FAETP</b><br>kg1,4-DCB-Eq | <b>NREU</b><br>MJ | <b>HTP</b><br>kg1,4-DCB-Eq | <b>ADP</b><br>kgSb-Eq |
|------------------------------------|-------------------------------------|------------------------------|-------------------|----------------------------|-----------------------|
| <b>PU</b>                          | 5.2967                              | 0.0818                       | 88.8417           | 4.5308                     | 4.81E-05              |
| <b>H<sub>2</sub></b>               | 0.0297                              | 0.0023                       | 1.7420            | 0.0231                     | 1.43E-08              |
| <b>Al<sub>2</sub>O<sub>3</sub></b> | 0.0170                              | 0.0004                       | 0.2491            | 0.0051                     | 1.75E-08              |
| <b>MoO<sub>3</sub></b>             | 0.0157                              | 0.0013                       | 0.1633            | 0.0629                     | 4.47E-05              |
| <b>S powder</b>                    | 0.0001                              | 0.0000                       | 0.0018            | 0.0001                     | 1.55E-11              |
| <b>K<sub>2</sub>CO<sub>3</sub></b> | 0.0155                              | 0.0002                       | 0.1764            | 0.0156                     | 1.78E-07              |
| <b>Energy</b>                      | 0.0006                              | 0.0000                       | 0.0050            | 0.0008                     | 1.20E-09              |
| <b>Waste</b>                       | 0.4462                              | 0.0069                       | 7.4849            | 0.3817                     | 4.05E-06              |
| <b>Aromatic amine</b>              | -0.8766                             | -0.0072                      | -21.2104          | -0.9672                    | -8.36E-06             |
| <b>Polyol</b>                      | -2.2547                             | -0.0149                      | -44.1899          | -0.1621                    | -5.30E-07             |
| <b>Methanol</b>                    | -0.0351                             | -0.0017                      | -1.5690           | -0.0079                    | -8.52E-08             |
| <b>Total</b>                       | 2.6551                              | 0.0691                       | 31.6946           | 3.8828                     | 8.81E-05              |

Note: The environmental impacts were assessed for five impact categories using the CML (v4.8 2016 no LT) method: Global Warming Potential (GWP) (kgCO<sub>2</sub>-Eq), Freshwater Aquatic Ecotoxicity Potential (FAETP) (kg1,4-DCB-Eq), Non-Renewable Energy Use (NREU) (MJ), Human Toxicity Potential (HTP) (kg1,4-DCB-Eq), and Abiotic Depletion Potential (ADP) (kgSb-Eq). Based on published reports, the target product yield was assumed to be comparable across the catalytic systems evaluated.<sup>9, 11</sup> Therefore, the functional unit was defined as 1 kg of PU. The catalyst was assumed to be used for 10 cycles.

**Table S6.** LCA calculation data of the NiMo/ $\gamma$ -Al<sub>2</sub>O<sub>3</sub> system.

|                                                                                 | <b>GWP</b><br>kgCO <sub>2</sub> -Eq | <b>FAETP</b><br>kg1,4-DCB-Eq | <b>NREU</b><br>MJ | <b>HTP</b><br>kg1,4-DCB-Eq | <b>ADP</b><br>kgSb-Eq |
|---------------------------------------------------------------------------------|-------------------------------------|------------------------------|-------------------|----------------------------|-----------------------|
| <b>PU</b>                                                                       | 5.2967                              | 0.0818                       | 88.8417           | 4.5308                     | 4.81E-05              |
| <b>H<sub>2</sub></b>                                                            | 0.0297                              | 0.0023                       | 1.7420            | 0.0231                     | 1.43E-08              |
| <b>(NH<sub>4</sub>)<sub>6</sub>Mo<sub>7</sub>O<sub>24</sub>·4H<sub>2</sub>O</b> | 0.0784                              | 0.0066                       | 0.8167            | 0.3148                     | 2.24E-04              |
| <b>Ni(NO<sub>3</sub>)<sub>2</sub>·6H<sub>2</sub>O</b>                           | 0.0331                              | 0.0338                       | 0.4123            | 0.1479                     | 4.02E-06              |
| <b>S powder</b>                                                                 | 0.0008                              | 0.0000                       | 0.0101            | 0.0004                     | 8.81E-11              |
| <b><math>\gamma</math>-Al<sub>2</sub>O<sub>3</sub></b>                          | 0.0235                              | 0.0005                       | 0.3441            | 0.0071                     | 2.42E-08              |
| <b>KOH</b>                                                                      | 0.0160                              | 0.0002                       | 0.1872            | 0.0145                     | 1.73E-07              |
| <b>Energy</b>                                                                   | 0.0008                              | 0.0000                       | 0.0064            | 0.0010                     | 1.53E-09              |
| <b>Waste</b>                                                                    | 0.4462                              | 0.0069                       | 7.4849            | 0.3817                     | 4.05E-06              |
| <b>Aromatic amine</b>                                                           | -0.8766                             | -0.0072                      | -21.2104          | -0.9672                    | -8.36E-06             |
| <b>Polyol</b>                                                                   | -2.2547                             | -0.0149                      | -44.1899          | -0.1621                    | -5.30E-07             |
| <b>Methanol</b>                                                                 | -0.0351                             | -0.0017                      | -1.5690           | -0.0079                    | -8.52E-08             |
| <b>Total</b>                                                                    | 2.7588                              | 0.1083                       | 32.8758           | 4.2840                     | 2.71E-04              |

**Table S7.** LCA calculation data of the Pd/ $\gamma$ -Al<sub>2</sub>O<sub>3</sub> system.

|                                                        | <b>GWP</b><br>kgCO <sub>2</sub> -Eq | <b>FAETP</b><br>kg1,4-DCB-Eq | <b>NREU</b><br>MJ | <b>HTP</b><br>kg1,4-DCB-Eq | <b>ADP</b><br>kgSb-Eq |
|--------------------------------------------------------|-------------------------------------|------------------------------|-------------------|----------------------------|-----------------------|
| <b>PU</b>                                              | 5.2967                              | 0.0818                       | 88.8417           | 4.5308                     | 4.81E-05              |
| <b>H<sub>2</sub></b>                                   | 0.0297                              | 0.0023                       | 1.7420            | 0.0231                     | 1.43E-08              |
| <b>Pd(NO<sub>3</sub>)<sub>2</sub>·2H<sub>2</sub>O</b>  | 5.6116                              | 0.1325                       | 78.6834           | 3.6162                     | 3.77E-04              |
| <b><math>\gamma</math>-Al<sub>2</sub>O<sub>3</sub></b> | 0.0112                              | 0.0002                       | 0.1638            | 0.0034                     | 1.15E-08              |
| <b>KOH</b>                                             | 0.0027                              | 0.0000                       | 0.0312            | 0.0024                     | 2.88E-08              |
| <b>Energy</b>                                          | 0.0012                              | 0.0001                       | 0.0092            | 0.0014                     | 2.20E-09              |
| <b>Waste</b>                                           | 0.4462                              | 0.0069                       | 7.4849            | 0.3817                     | 4.05E-06              |
| <b>Aromatic amine</b>                                  | -0.8766                             | -0.0072                      | -21.2104          | -0.9672                    | -8.36E-06             |
| <b>Polyol</b>                                          | -2.2547                             | -0.0149                      | -44.1899          | -0.1621                    | -5.30E-07             |
| <b>Methanol</b>                                        | -0.0351                             | -0.0017                      | -1.5690           | -0.0079                    | -8.52E-08             |
| <b>Total</b>                                           | 8.2328                              | 0.2000                       | 109.9868          | 7.4217                     | 4.20E-04              |

## Supplementary Figures

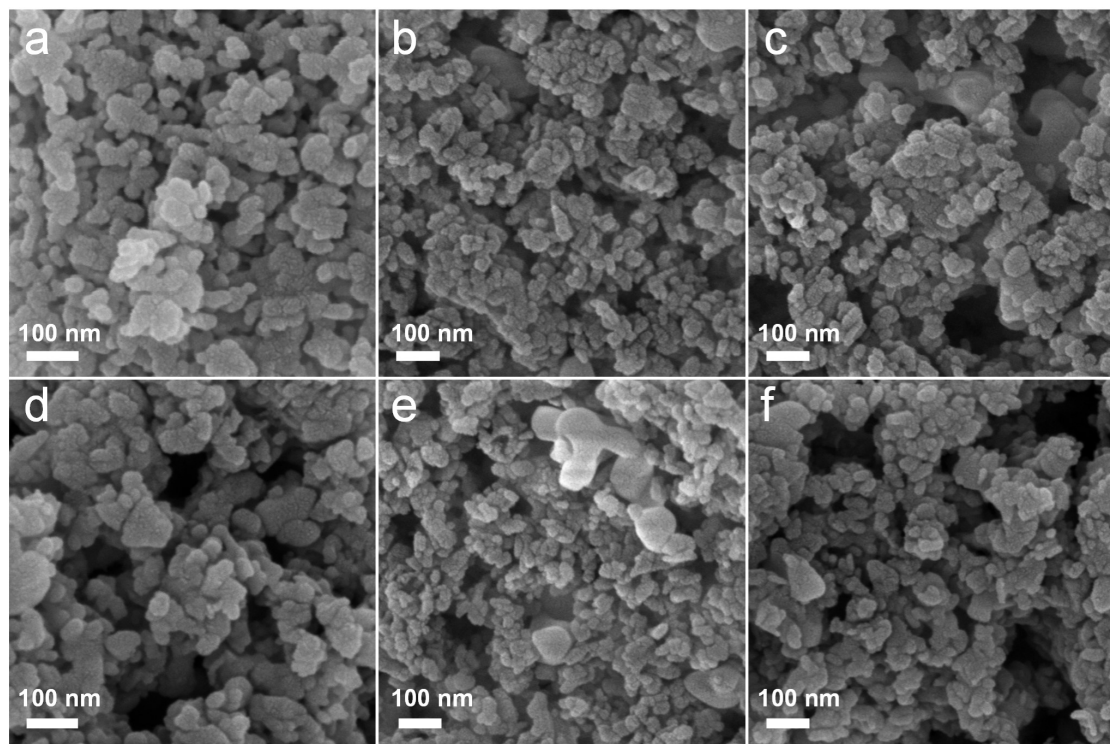

**Fig. S1** SEM images of Al<sub>2</sub>O<sub>3</sub> (a–c) and MoS<sub>2</sub>/Al<sub>2</sub>O<sub>3</sub> (d–f).

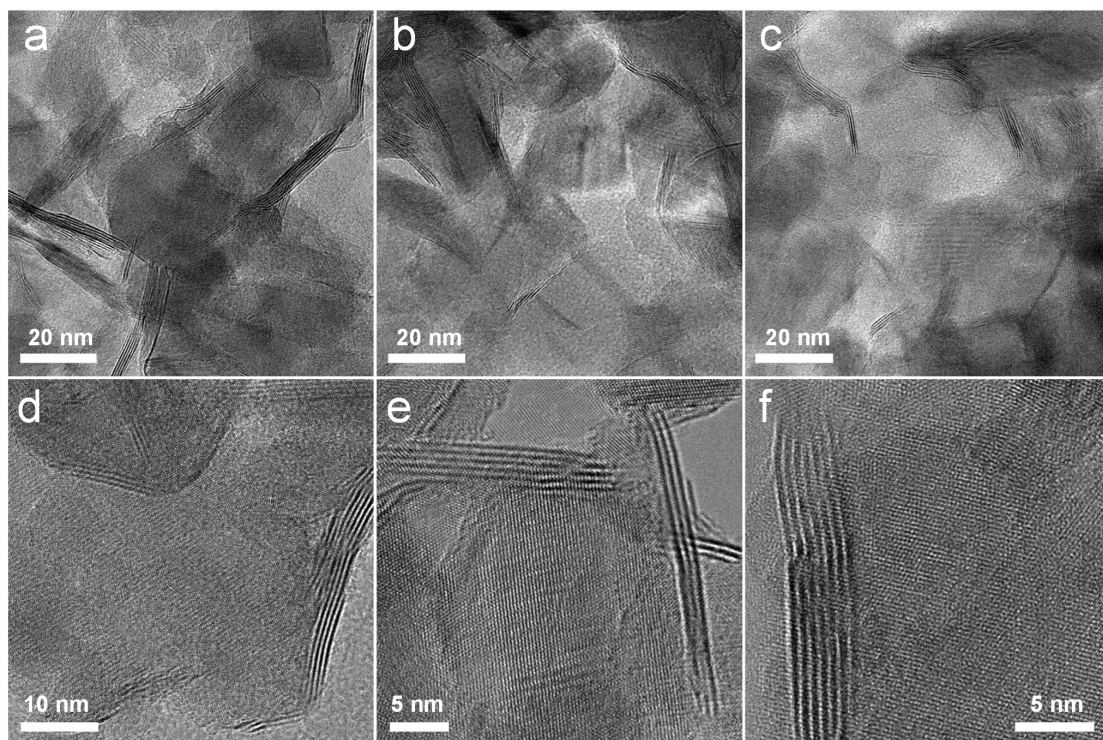

**Fig. S2** HR-TEM images of MoS<sub>2</sub>/Al<sub>2</sub>O<sub>3</sub> (a–f).

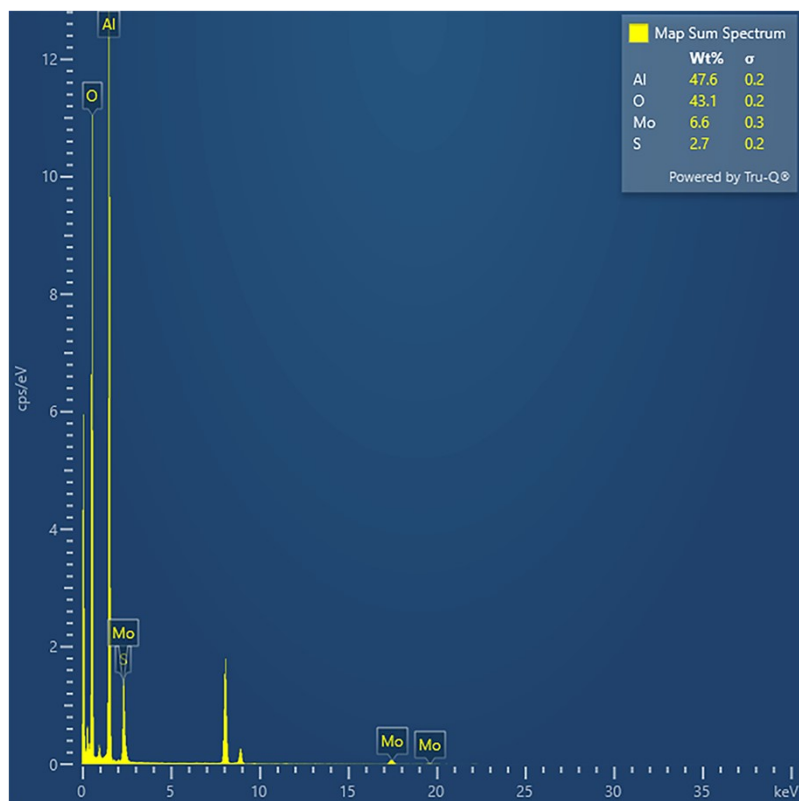

**Fig. S3** EDS spectrum of the  $\text{MoS}_2/\text{Al}_2\text{O}_3$ .

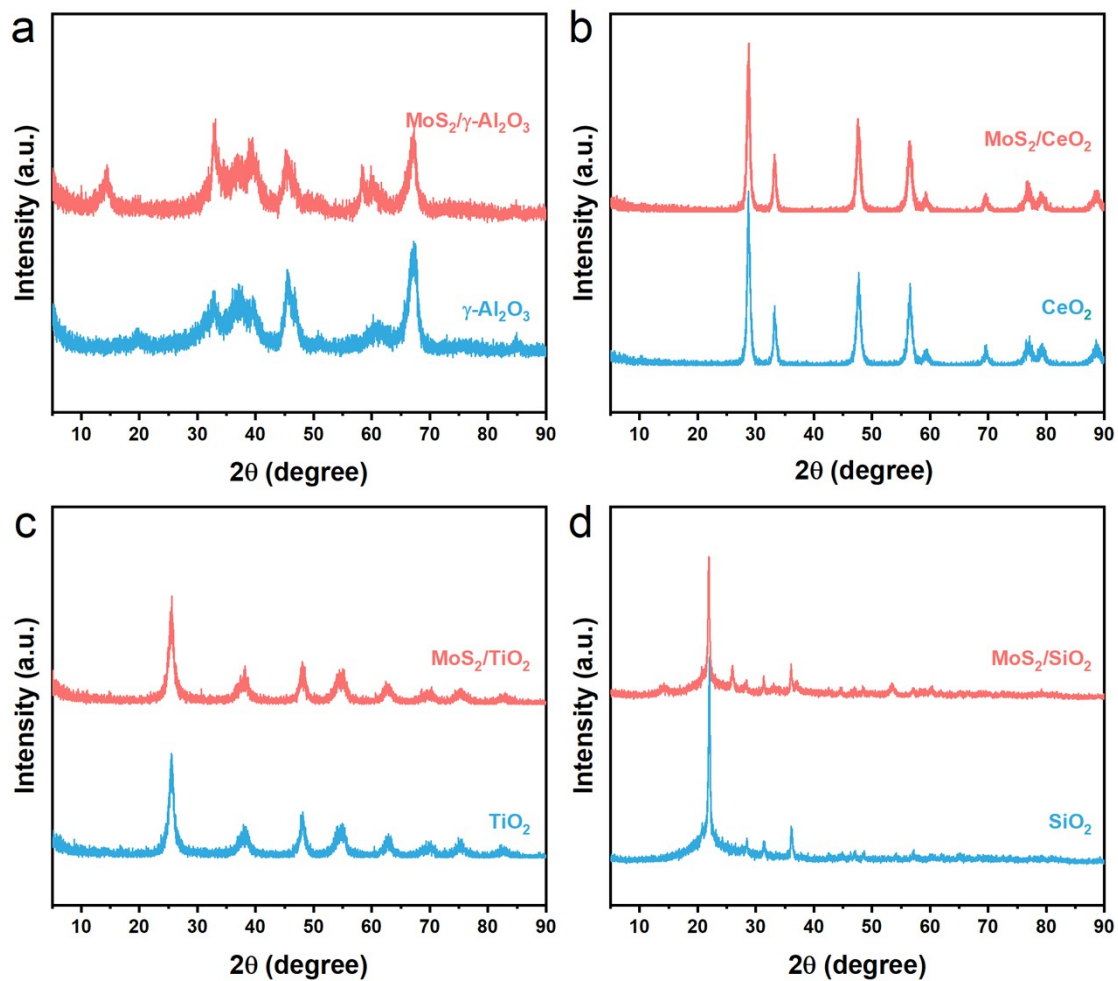

**Fig. S4** XRD patterns of different support materials and their corresponding  $\text{MoS}_2$ -loaded catalysts. **(a)**  $\gamma\text{-Al}_2\text{O}_3$  and  $\text{MoS}_2/\gamma\text{-Al}_2\text{O}_3$ . **(b)**  $\text{CeO}_2$  and  $\text{MoS}_2/\text{CeO}_2$ . **(c)**  $\text{TiO}_2$  and  $\text{MoS}_2/\text{TiO}_2$ . **(d)**  $\text{SiO}_2$  and  $\text{MoS}_2/\text{SiO}_2$ .

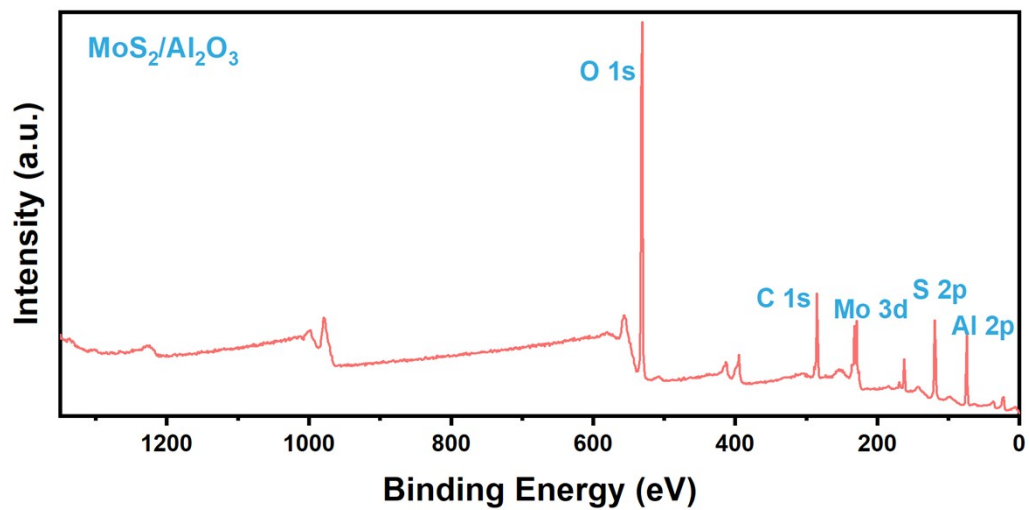

Fig. S5 XPS survey spectrum of the MoS<sub>2</sub>/Al<sub>2</sub>O<sub>3</sub> catalyst.

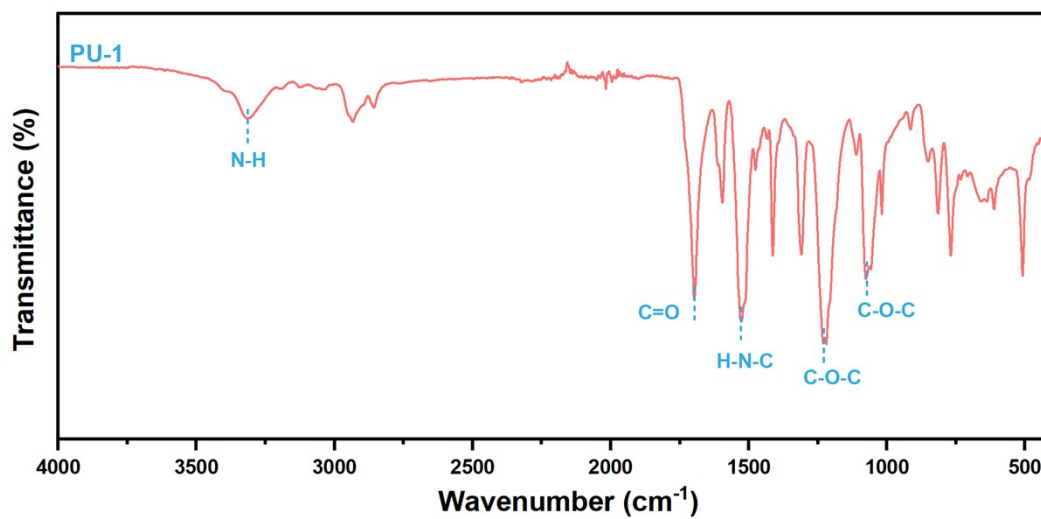

Fig. S6 FT-IR spectrum of PU-1.

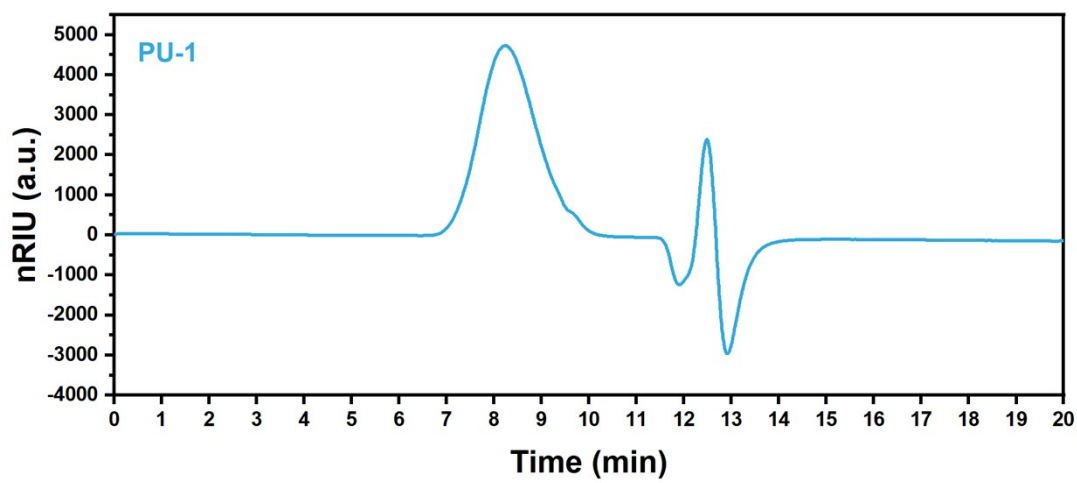

Fig. S7 GPC chromatogram of PU-1.

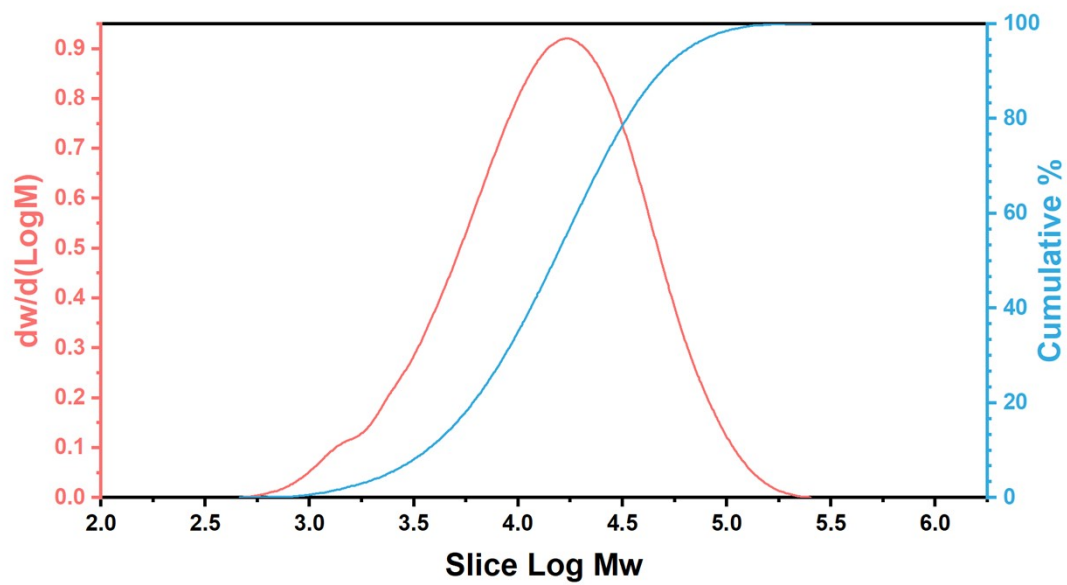

**Fig. S8** Molecular weight distribution of **PU-1** (GPC).

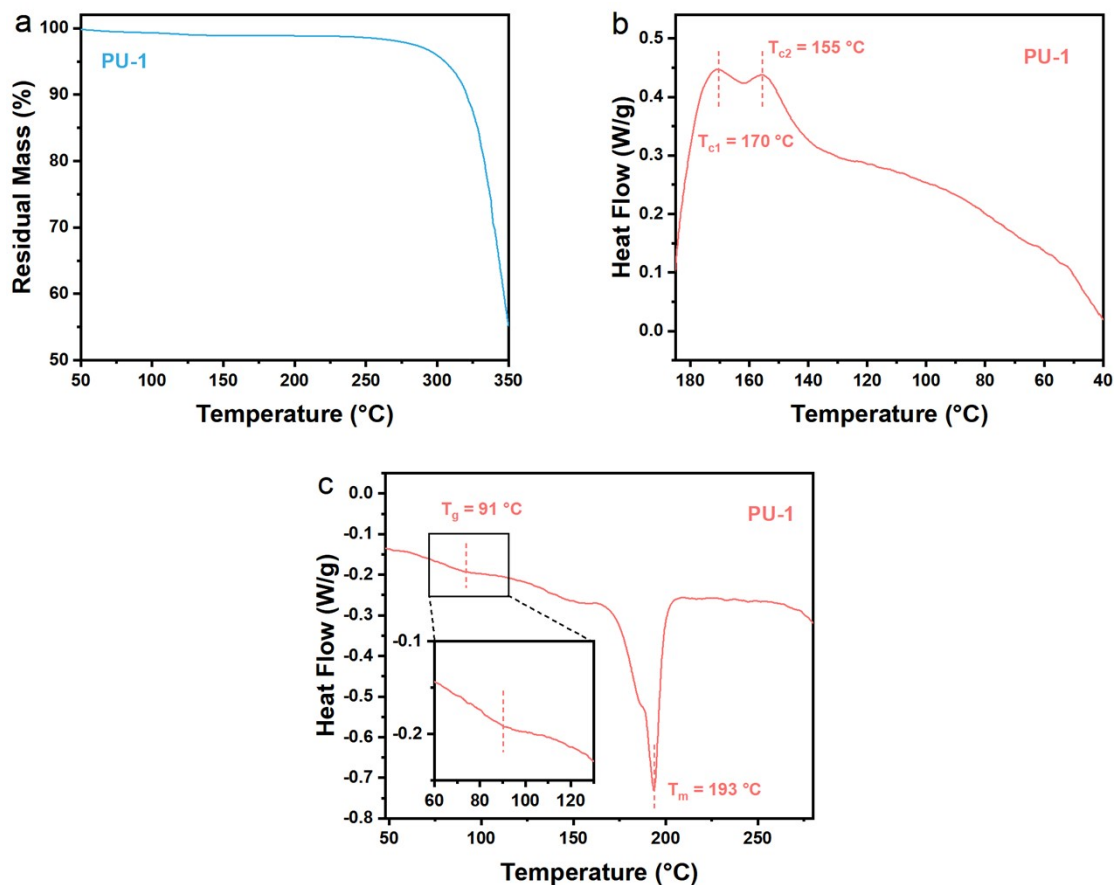

**Fig. S9** TGA curve (a) and DSC curve (b, c) of PU-1. The DSC measurement was conducted as follows: heating from 30 °C to 185 °C at 10 °C min<sup>-1</sup>, holding for 5 min; then cooling to 30 °C at 5 °C min<sup>-1</sup>, holding for 15 min; and finally heating to 280 °C at 10 °C min<sup>-1</sup>.

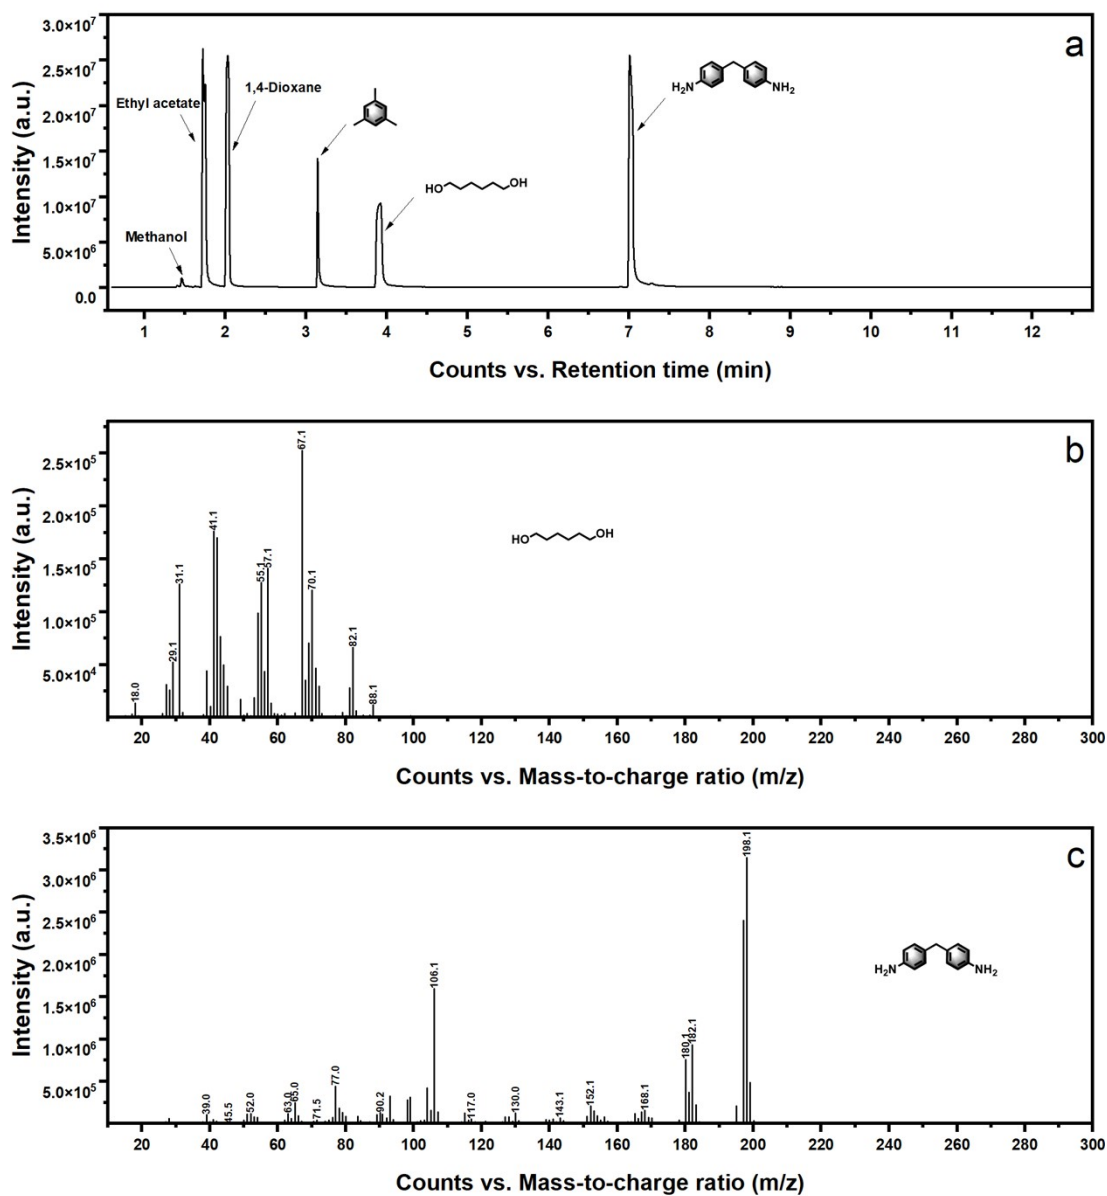

**Fig. S10** GC-MS chromatogram (a) and mass spectra (b, c) of the products from PU-1 hydrogenation. Reaction conditions: 300 mg of PU-1, 50 mg of MoS<sub>2</sub>/Al<sub>2</sub>O<sub>3</sub> catalyst, 15 mg of K<sub>2</sub>CO<sub>3</sub>, 5 mL of 1,4-dioxane, 185 °C, 5 MPa of H<sub>2</sub>, 12 h, and stirring at 600 rpm.

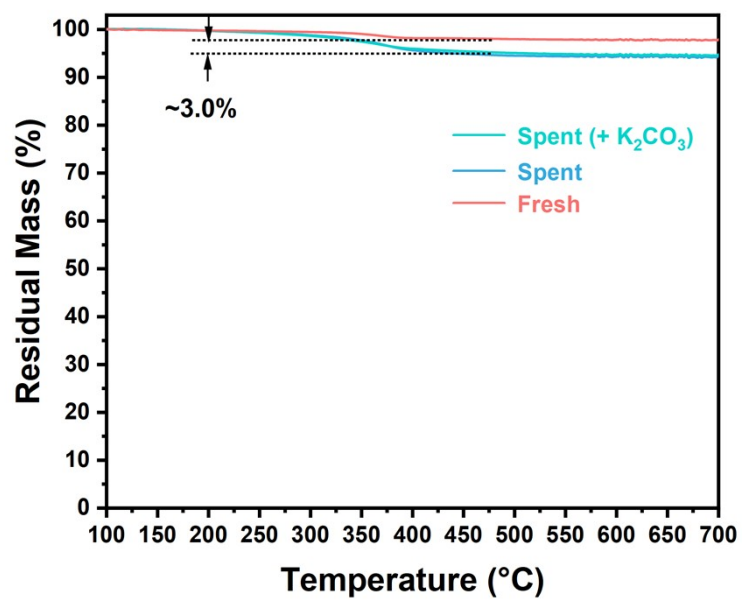

**Fig. S11** TGA curves of the fresh, spent, and spent (with K<sub>2</sub>CO<sub>3</sub> additive) MoS<sub>2</sub>/Al<sub>2</sub>O<sub>3</sub>.

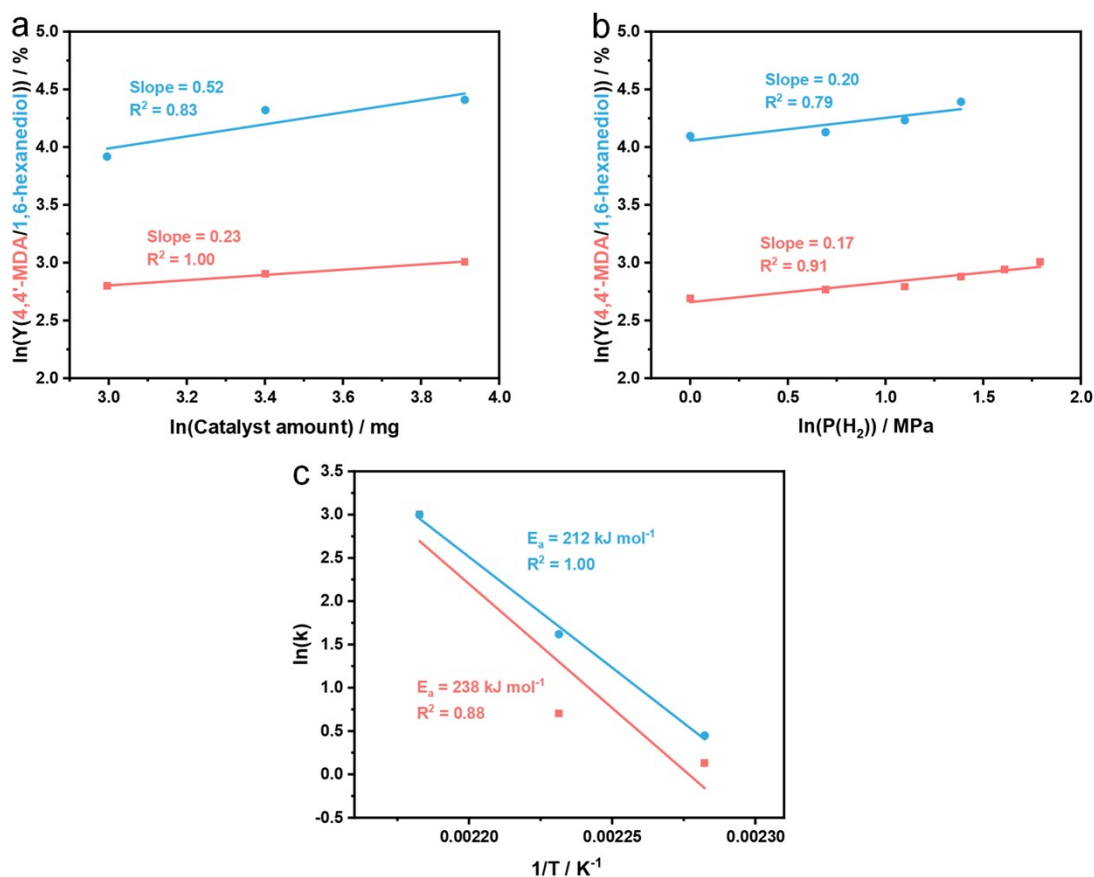

**Fig. S12** (a) Linear fitting for the apparent reaction order with respect to catalyst amount for 4,4'-MDA and 1,6-hexanediol. (b) Linear fitting for the apparent reaction order with respect to  $\text{H}_2$  pressure for 4,4'-MDA and 1,6-hexanediol. (c) Arrhenius plot for the apparent activation energy of 4,4'-MDA and 1,6-hexanediol.

Note: Owing to the lack of a well-defined substrate concentration for PU, product yield was used instead of conversion for the apparent kinetic calculations. The apparent rate equations are expressed as follows: for 4,4'-MDA,  $r_1 = A_1 \exp(-238000/(8.314T))(\text{catalyst amount, mg})^{0.23}(\text{P}(\text{H}_2, \text{MPa}))^{0.17}$ ; for 1,6-hexanediol,  $r_2 = A_2 \exp(-212000/(8.314T))(\text{catalyst amount, mg})^{0.52}(\text{P}(\text{H}_2, \text{MPa}))^{0.20}$ . Herein,  $A_1$  and  $A_2$  are the pre-exponential factors for 4,4'-MDA and 1,6-hexanediol, respectively; 8.314 is the universal gas constant ( $\text{J}\cdot\text{mol}^{-1}\cdot\text{K}^{-1}$ );  $T$  is the absolute temperature (K); the units of activation energy are  $\text{J}\cdot\text{mol}^{-1}$ , the catalyst amount is mg, and the  $\text{H}_2$  pressure is MPa. The rate-determining step (RDS) for 4,4'-MDA formation is the catalytic cleavage of the urethane C–N bond in PU. In contrast, RDS for 1,6-hexanediol formation is associated with the adsorption/activation of  $\text{H}_2$  on the catalyst surface.

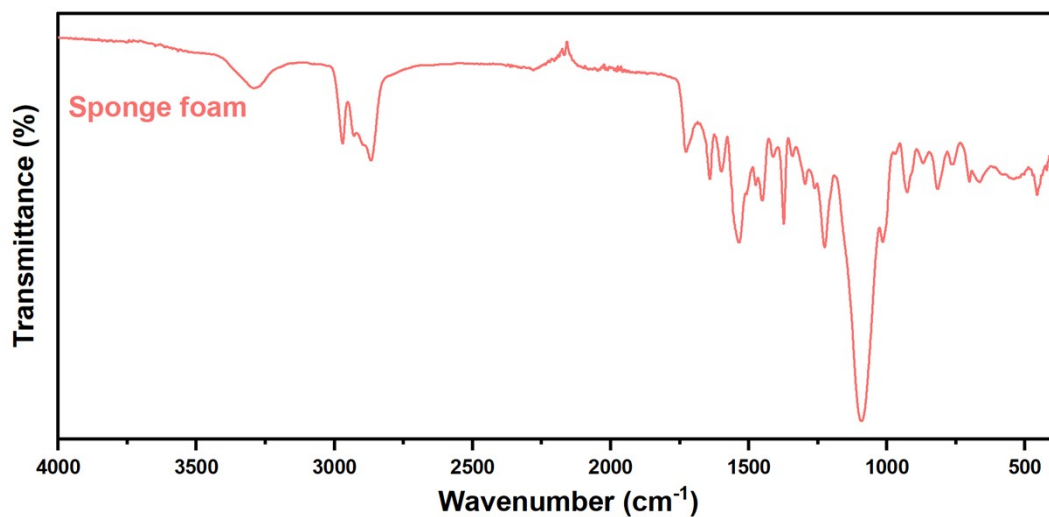

Fig. S13 FT-IR spectrum of sponge foam.

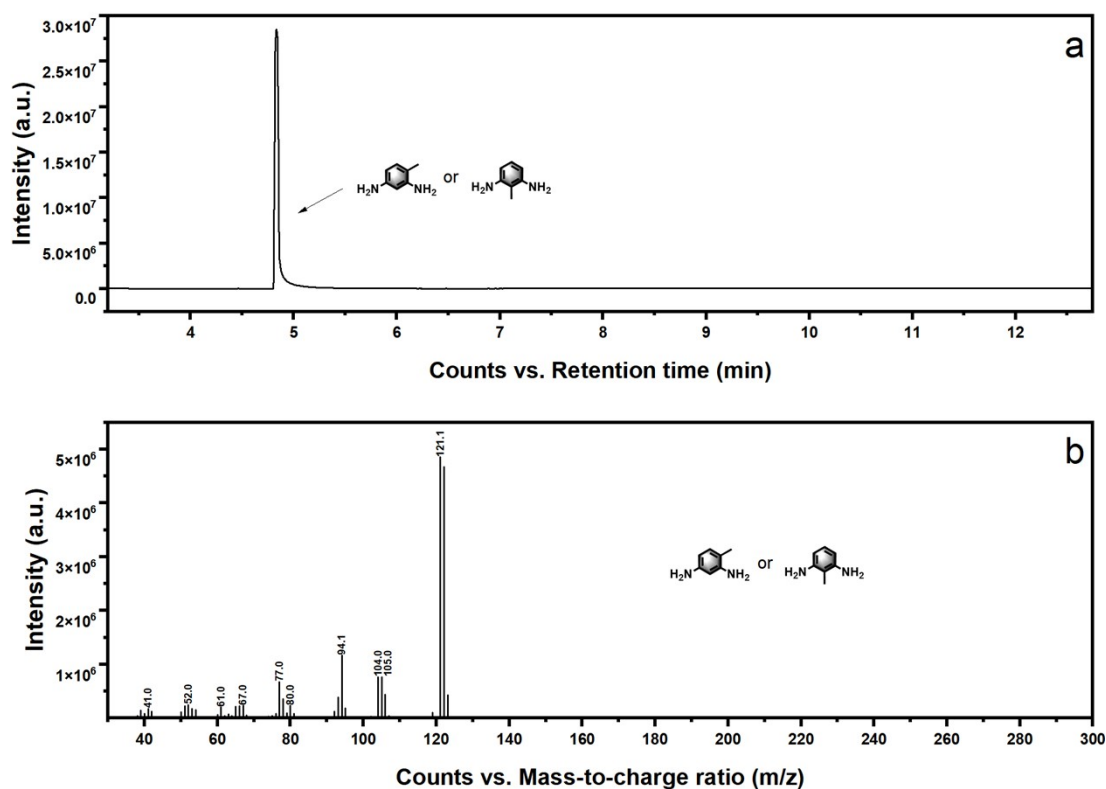

Fig. S14 GC-MS chromatogram (a) and mass spectra (b, c) of the products from sponge foam hydrogenation. Reaction conditions: 2500 mg of sponge foam, 420 mg of  $\text{MoS}_2/\text{Al}_2\text{O}_3$ , 175 mg of  $\text{K}_2\text{CO}_3$ , 10 mL of 1,4-dioxane, 190 °C, 7 MPa of  $\text{H}_2$ , 20 h, and stirring at 600 rpm.

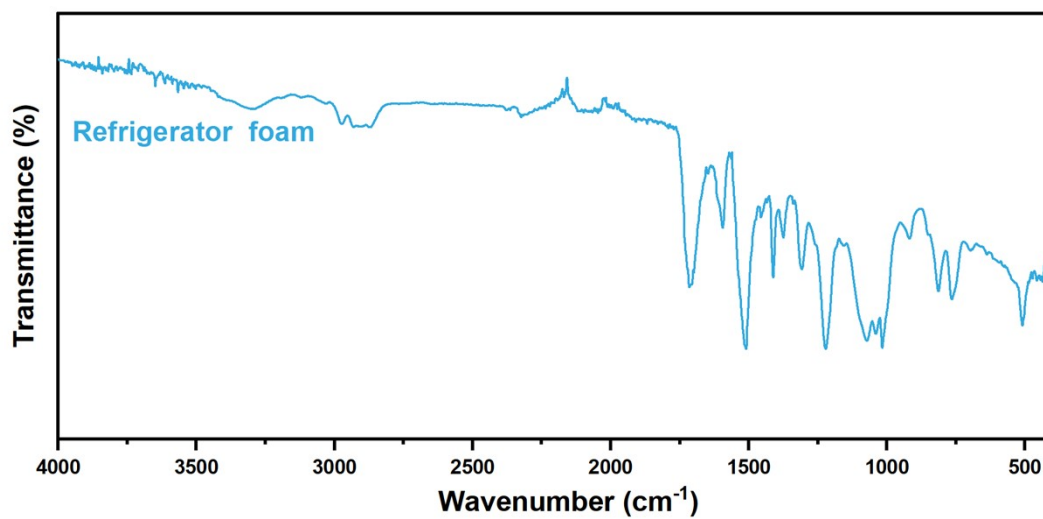

**Fig. S15** FT-IR spectrum of refrigerator foam.

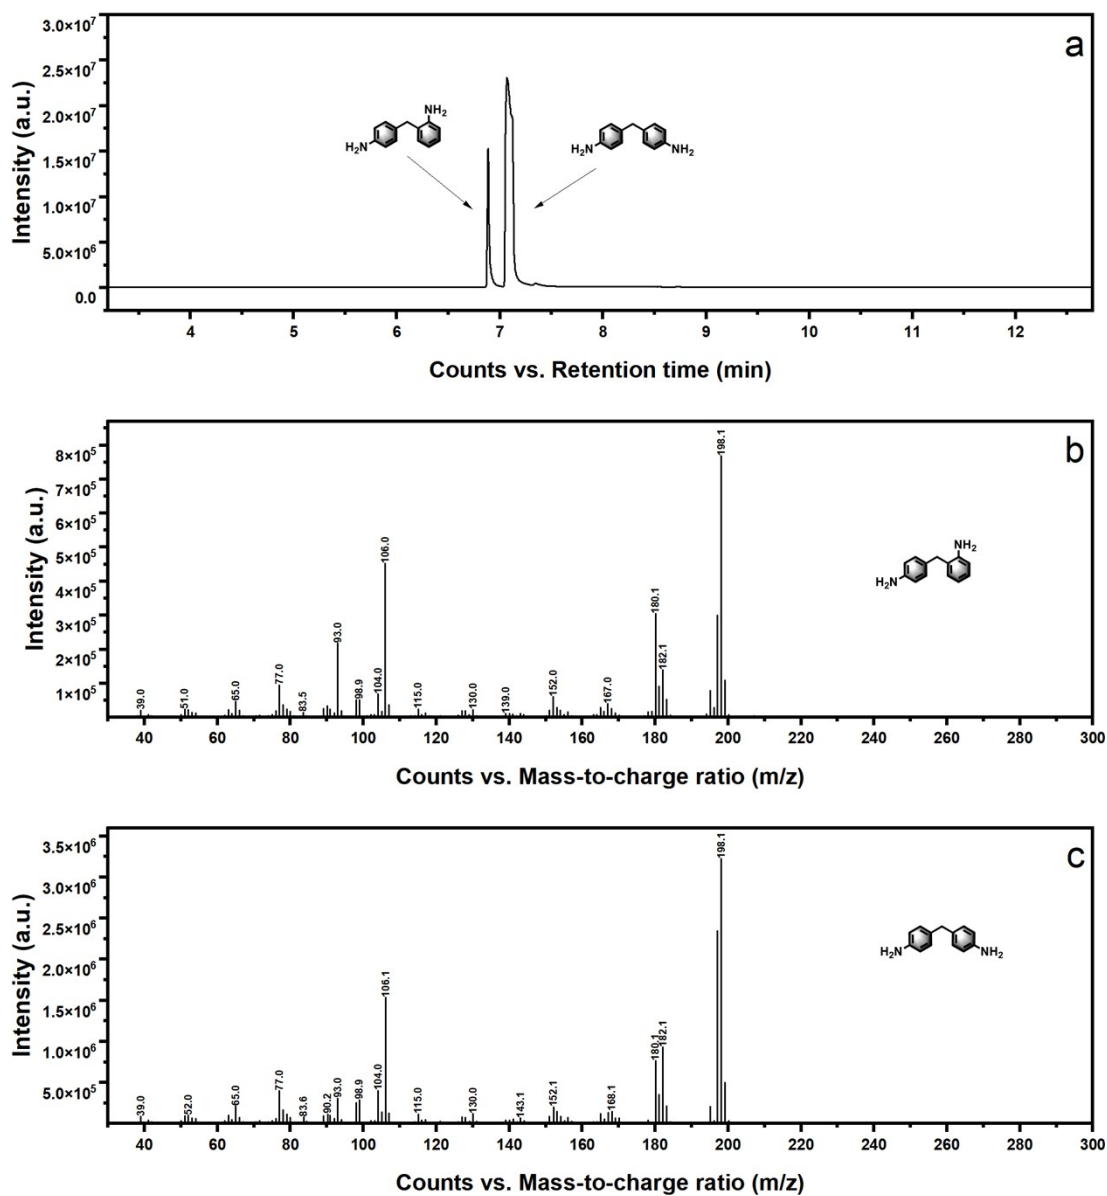

**Fig. S16** GC-MS chromatogram (a) and mass spectra (b, c) of the products from refrigerator foam hydrogenation. Reaction conditions: 2500 mg of refrigerator foam, 420 mg of  $\text{MoS}_2/\text{Al}_2\text{O}_3$ , 175 mg of  $\text{K}_2\text{CO}_3$ , 10 mL of 1,4-dioxane, 190 °C, 7 MPa of  $\text{H}_2$ , 20 h, and stirring at 600 rpm.

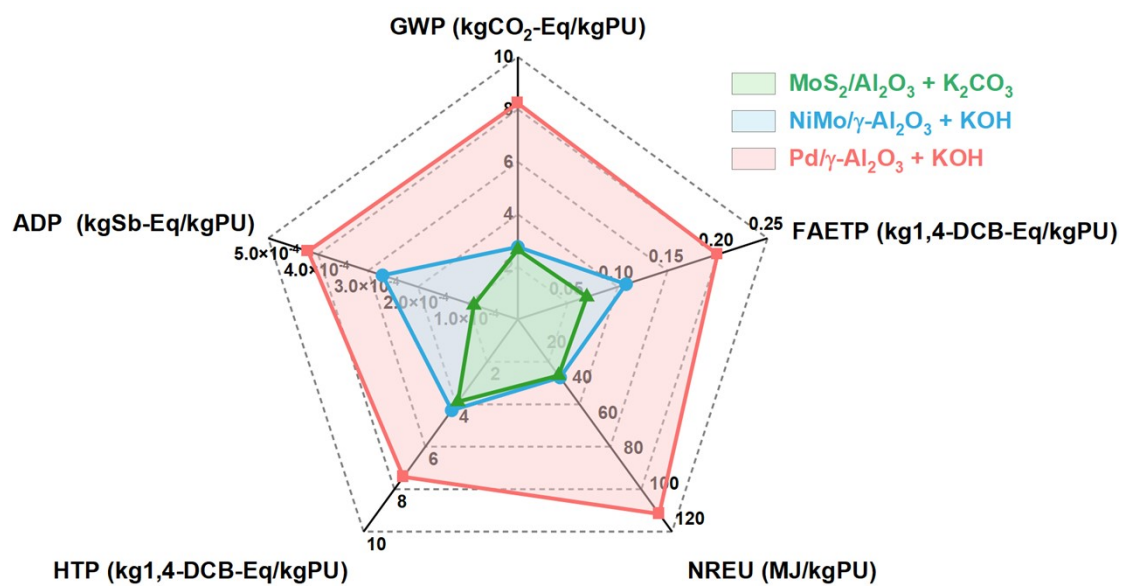

**Fig. S17** Radar chart comparing the relative environmental impacts of three catalytic systems (MoS<sub>2</sub>/Al<sub>2</sub>O<sub>3</sub> + K<sub>2</sub>CO<sub>3</sub>, NiMo/γ-Al<sub>2</sub>O<sub>3</sub> + KOH, and Pd/γ-Al<sub>2</sub>O<sub>3</sub> + KOH) across five LCA indicators: GWP, FAETP, NREU, HTP and ADP. Data correspond to Tables S5–7.

## References

- 1 A. Kumar, N. von Wolff, M. Rauch, Y. Q. Zou, G. Shmul, Y. Ben-David, G. Leitus, L. Avram and D. Milstein, *J. Am. Chem. Soc.*, 2020, **142**, 14267-14275.
- 2 W. Zhou, P. Neumann, M. Al Batal, F. Rominger, A. S. K. Hashmi and T. Schaub, *ChemSusChem*, 2021, **14**, 4176-4180.
- 3 L. Gausas, S. K. Kristensen, H. Sun, A. Ahrens, B. S. Donslund, A. T. Lindhardt and T. Skrydstrup, *JACS Au*, 2021, **1**, 517-524.
- 4 X. Liu and T. Werner, *Chem. Sci.*, 2021, **12**, 10590-10597.
- 5 V. Zubar, A. T. Haedler, M. Schütte, A. S. K. Hashmi and T. Schaub, *ChemSusChem*, 2022, **15**, e202101606.
- 6 L. Gausas, B. S. Donslund, S. K. Kristensen and T. Skrydstrup, *ChemSusChem*, 2022, **15**, e202101705.
- 7 Z. Wang, X. L. Yan, N. Ma, S. Liu, P. Han, H. L. Li, Q. Mahmood, L. B. Li and Q. B. Liu, *J. Catal.*, 2023, **428**, 115165.
- 8 B. Sun, J. W. Zou, W. J. Qiu, S. H. Tian, M. L. Wang, H. Y. Tang, B. T. L. Wang, S. F. Luan, X. Y. Tang, M. Wang and D. Ma, *Natl. Sci. Rev.*, 2025, **12**, nwae393.
- 9 W. Q. An, X. Liu, X. D. Zhang, R. T. Gao, Z. J. Chen, Y. D. Hou and H. Du, *ChemSusChem*, 2025, **18**, e202402321.
- 10 X. B. Wu, R. C. Turnell-Ritson, P. J. Han, J. C. Schmidt, L. Piveteau, N. Yan and P. J. Dyson, *Nat. Commun.*, 2025, **16**, 4322.
- 11 B. Sole, J. S. Kolb, R. Marcial-Hernandez, J. Luk, T. Williams, O. V. Magdysyuk, D. Sheppard, G. Walker and A. Kumar, *ACS Sustainable Chem. Eng.*, 2025, **13**, 17173-17181.
